# Supplementary material for: The Smc5/6 Complex Restricts HBV when Localized to ND10 without Inducing an Innate Immune Response and Is Counteracted by the HBV X Protein Shortly after Infection
Source: PLoS One. 2017 Jan 17;12(1):e0169648. doi: 10.1371/journal.pone.0169648 (PMC5240991; doi:10.1371/journal.pone.0169648)
Supplement: S2 Table — Expression of top IFN-induced genes in PHH infected with HBV or treated with either IFN-α or poly(I:C) expressed as mean log2 fold-change (FC) of two independent PHH donors. All genes (n = 100) had a mean fold-change >2 and FDR<0.05 at 8 hours post-treatment with IFN-α relative to the time-matched mock-infected control, and passed a low-expression filter. FDR values of less than 0.05 are highlighted in pink. (XLSX) [file pone.0169648.s018.xlsx]

## Sheet: S2 Table
S2 Table. HBV infection does not induce ISG expression in PHH.
Gene	Description	HBV-infected																				IFN-a						poly(I:C)
		4h		8h		12h		24h		2d		3d		6d		8d		10d		13d		4h		8h		24h		4h		8h		24h
		FC	FDR	FC	FDR	FC	FDR	FC	FDR	FC	FDR	FC	FDR	FC	FDR	FC	FDR	FC	FDR	FC	FDR	FC	FDR	FC	FDR	FC	FDR	FC	FDR	FC	FDR	FC	FDR
IFI44L	Homo sapiens interferon-induced protein 44-like (IFI44L), mRNA	-0.37086	0.999617	1.97586	0.999911	0.436321	0.962065	3.16982	0.999667	-1.4693	0.644931	-0.41047	0.984767	1.43042	0.99932	-2.76134	0.465991	0.437927	0.99973	-1.37328	0.59738	9.3555	3.85e-08	11.7939	7.8e-09	12.2753	3.24e-07	5.20282	0.000719	11.0358	2.52e-08	13.6818	8.19e-09
RSAD2	Homo sapiens radical S-adenosyl methionine domain containing 2 (RSAD2), mRNA	1.03975	0.999617	0.262936	0.999911	-0.68471	0.783862	0.859704	0.999667	-0.44796	0.814234	-0.36261	0.957932	-0.33508	0.99932	-1.08881	0.463073	-0.2268	0.99973	-1.03606	0.260526	10.3885	1.9e-14	9.92494	1.47e-17	7.48402	6.62e-11	7.96296	3.15e-11	10.1755	9.51e-18	9.71122	4.21e-14
MX2	Homo sapiens myxovirus (influenza virus) resistance 2 (mouse) (MX2), mRNA	0.846129	0.999617	-0.78785	0.999911	1.81238	0.718809	-0.54375	0.999667	-0.62183	0.883821	-1.63609	0.86436	-0.29162	0.99932	-1.14115	0.757817	-0.3036	0.99973	0.082777	0.979087	7.99375	8.15e-09	9.80879	3.18e-11	5.97655	1.93e-07	3.79705	0.002347	8.81686	3.31e-10	8.69168	9.97e-12
IFIT1	Homo sapiens interferon-induced protein with tetratricopeptide repeats 1 (IFIT1)	0.236417	0.999617	-0.07083	0.999911	-0.29739	0.78813	0.581238	0.999667	0.43602	0.425585	0.415984	0.729542	0.543401	0.914519	0.041418	0.954151	0.07532	0.99973	-0.17076	0.715258	8.41275	5.44e-21	9.37908	5.87e-22	6.49179	3.83e-18	6.22614	3.55e-18	8.77407	1.22e-21	7.24317	7.48e-20
LAMP3	Homo sapiens lysosomal-associated membrane protein 3 (LAMP3), mRNA	0.772775	0.999617	1.08336	0.999911	-0.61864	0.81601	0.695415	0.999667	-0.52587	0.821397	-0.05661	0.997087	1.23347	0.99932	-0.61778	0.681262	0.780253	0.99973	-0.9886	0.270732	8.61676	1.88e-13	9.36475	1.55e-15	7.02315	8.22e-13	4.77545	3.25e-07	8.57294	1.45e-14	8.88453	6.98e-16
SIDT1	Homo sapiens SID1 transmembrane family, member 1 (SIDT1), mRNA	0.648664	0.999617	1.86923	0.999911	2.17135	0.525139	-1.14069	0.999667	-0.71746	0.791684	0.515066	0.960423	-0.46505	0.99932	-1.76023	0.381795	-0.16215	0.99973	-1.58419	0.310521	6.55815	1.28e-06	9.21378	3.03e-09	2.64893	0.021011	1.5117	0.350766	7.8995	6.88e-08	5.49977	8.1e-07
LGALS17A	Homo sapiens Charcot-Leyden crystal protein pseudogene (LGALS17A), non-coding RNA	-0.10758	0.999617	-0.89803	0.999911	-0.151	0.985394	0.011187	0.999667	-0.5664	0.927529	0.163183	0.996361	0.903241	0.99932	1.01126	0.798178	0.092898	0.99973	-0.13221	0.972888	9.28721	1.34e-07	9.07951	7.06e-08	4.45634	0.009588	4.40697	0.008819	8.85609	9.43e-08	6.33248	7.59e-05
CXCL11	Homo sapiens chemokine (C-X-C motif) ligand 11 (CXCL11), mRNA	1.07555	0.999617	0.330238	0.999911	-0.29697	0.934817	0.108017	0.999667	-0.78928	0.809572	-0.39404	0.974015	-0.23264	0.99932	-0.50282	0.88742	1.59589	0.99973	0.141767	0.963881	9.79074	3.96e-10	8.63213	1.53e-14	6.13262	7.98e-07	9.68849	1.19e-09	10.2617	2.51e-16	11.3633	2.29e-13
GBP1P1	Homo sapiens guanylate binding protein 1, interferon-inducible pseudogene 1 (GBP1P1), non-coding RNA	-0.42285	0.999617	1.03616	0.999911	1.75058	0.714261	0.457899	0.999667	1.26674	0.597373	0.511461	0.9399	0.981361	0.99932	0.728462	0.720412	1.85979	0.99973	0.196823	0.948864	8.10998	1.1e-08	8.53078	3.64e-08	4.47722	0.000691	6.04526	5.72e-06	8.98575	1.01e-08	6.84335	3.13e-07
ZBP1	Homo sapiens Z-DNA binding protein 1 (ZBP1)	-0.24565	0.999617	-0.1909	0.999911	1.41305	0.764067	0.503495	0.999667	-0.13891	0.98106	-1.11972	0.917446	0.77845	0.99932	0.771984	0.790416	-0.7569	0.99973	-0.89857	0.665364	5.22359	5.81e-06	8.42819	6.65e-09	3.81956	0.004782	1.7613	0.171805	8.05161	1.46e-08	7.97809	2.29e-08
CXCL10	Homo sapiens chemokine (C-X-C motif) ligand 10 (CXCL10), mRNA	0.76589	0.999617	-0.23553	0.999911	-0.99632	0.579349	0.950223	0.999667	-1.1027	0.757841	-0.55562	0.955121	0.184907	0.99932	-1.09749	0.583112	0.901406	0.99973	-0.20247	0.914169	9.53356	4.03e-12	8.11916	4.39e-12	4.66792	1.65e-05	8.58045	6.84e-11	8.76341	1.27e-12	10.3786	4.44e-12
TNFSF18	Homo sapiens tumor necrosis factor (ligand) superfamily, member 18 (TNFSF18), mRNA	-0.10758	0.999617	-0.08601	0.999911	-0.151	0.97585	0.826272	0.999667	0.169506	0.96278	0.163183	0.988252	-0.72469	0.99932	0.19277	0.938339	0.092898	0.99973	0.479104	0.770136	6.70419	3.14e-10	7.87346	4.41e-12	-0.01216	0.994209	6.61878	9.68e-10	9.37935	3.8e-14	5.0453	2.28e-07
ATP10A	Homo sapiens ATPase, class V, type 10A (ATP10A), mRNA	0.242201	0.999617	1.26292	0.999911	-0.08498	0.991738	1.6311	0.999667	0.469794	0.938189	-0.36516	0.983734	0.468683	0.99932	0.28443	0.952101	1.47236	0.99973	0.045279	0.992697	4.85562	0.001502	7.85721	1.12e-05	4.36151	0.018367	-1.34351	0.598899	6.4588	0.000163	7.96507	8.45e-06
BCL2L14	Homo sapiens BCL2-like 14 (apoptosis facilitator) (BCL2L14)	0.827258	0.999617	0.39807	0.999911	-0.74891	0.844074	0.697108	0.999667	-0.72811	0.825424	-1.01962	0.880479	-0.16505	0.99932	-0.19726	0.944324	0.50982	0.99973	0.018301	0.992728	9.28729	4.63e-09	7.69707	2.71e-09	4.17005	0.002075	5.15445	0.000259	7.95187	1.13e-09	8.16304	1.56e-08
OAS2	Homo sapiens 2'-5'-oligoadenylate synthetase 2, 69/71kDa (OAS2)	0.211829	0.999617	0.467619	0.999911	0.280625	0.904037	1.09913	0.999667	-0.15463	0.917228	-0.25772	0.947452	0.127676	0.99932	-0.23993	0.824883	0.111685	0.99973	-0.40104	0.591846	6.29143	1.42e-13	7.6306	4.62e-15	6.8166	3.91e-13	4.11845	3.06e-09	7.08296	2.04e-14	7.68146	1.01e-14
IFIT2	Homo sapiens interferon-induced protein with tetratricopeptide repeats 2 (IFIT2), mRNA	-0.10767	0.999617	-0.62675	0.999911	-0.54508	0.705619	-0.09249	0.999667	0.127867	0.937012	0.06494	0.991129	0.22214	0.99932	-0.09905	0.931464	0.040443	0.99973	-0.00606	0.994403	9.6869	3.54e-15	7.59364	5.42e-14	3.55082	1.87e-07	8.67379	8.17e-14	7.93749	2.45e-14	6.44676	1.06e-12
SAMD9L	Homo sapiens sterile alpha motif domain containing 9-like (SAMD9L), mRNA	0.903448	0.999617	0.535685	0.999911	1.21391	0.59762	0.523991	0.999667	-1.0433	0.51812	-0.96307	0.840276	-0.58303	0.99932	-0.42616	0.82003	0.140394	0.99973	-0.36952	0.791662	6.28239	4.83e-08	7.54796	8.61e-11	4.48338	1.88e-06	3.93992	0.000209	7.27458	1.66e-10	7.41052	1.11e-11
CCRL1	Homo sapiens chemokine (C-C motif) receptor-like 1 (CCRL1)	-0.44917	0.999617	-0.16405	0.999911	1.13814	0.81983	1.24189	0.999667	-1.06144	0.749147	-2.27726	0.751037	1.91195	0.99932	-0.49081	0.890579	-1.60334	0.99973	-0.26715	0.895076	5.07282	0.000221	7.51001	1.02e-06	4.59186	0.002796	1.83012	0.272033	7.14185	2.13e-06	8.67502	6.54e-08
KCNA1	Homo sapiens potassium voltage-gated channel, shaker-related subfamily, member 1 (episodic ataxia with myokymia) (KCNA1), mRNA	-0.92075	0.999617	-0.08601	0.999911	-0.95972	0.851367	0.011187	0.999667	-1.04241	0.797472	0.163183	0.993936	0.090113	0.99932	0.19277	0.96173	-0.71453	0.99973	-0.40065	0.888787	5.79179	7.73e-06	7.28005	3.02e-07	1.51345	0.37926	2.78121	0.03884	6.54352	2e-06	2.97673	0.030492
GBP5	Homo sapiens guanylate binding protein 5 (GBP5)	0.142424	0.999617	-0.55695	0.999911	-0.74469	0.860828	-0.92656	0.999667	0.45791	0.883698	-0.45583	0.960423	-0.40455	0.99932	0.140071	0.960066	1.04394	0.99973	0.448089	0.817117	6.84362	1.28e-08	7.19656	1.19e-09	0.976419	0.399864	5.40903	2.32e-06	8.9652	6e-12	6.09244	8.36e-09
IFI44	Homo sapiens interferon-induced protein 44 (IFI44), mRNA	0.300109	0.999617	0.589755	0.999911	0.579551	0.752921	0.842044	0.999667	-0.34623	0.788075	-0.36571	0.92668	0.169508	0.99932	-0.67278	0.468282	0.092712	0.99973	-0.12782	0.916213	5.57482	1.69e-12	7.17438	2.29e-14	5.95099	1.17e-11	4.39553	9.68e-10	6.88293	5.42e-14	6.89765	1.22e-13
OAS3	Homo sapiens 2'-5'-oligoadenylate synthetase 3, 100kDa (OAS3), mRNA	0.294139	0.999617	0.333862	0.999911	-0.06851	0.982666	1.00007	0.999667	-0.45673	0.72833	-0.4774	0.912934	0.255311	0.99932	-0.14484	0.925977	-0.03399	0.99973	-0.27359	0.789037	5.94424	4.88e-12	7.0865	5.8e-14	6.07276	9.88e-12	3.66493	2.06e-07	6.58217	2.41e-13	7.21495	8.74e-14
IFITM1	Homo sapiens interferon induced transmembrane protein 1 (9-27) (IFITM1), mRNA	0.413463	0.999617	0.389615	0.999911	-0.9531	0.613669	0.326025	0.999667	-0.07536	0.9838	0.093736	0.99608	1.75946	0.951566	-1.23051	0.518057	0.266462	0.99973	-0.96512	0.531681	5.54893	4.57e-11	7.04495	1.37e-14	7.73506	1.63e-13	2.40191	0.000628	6.0087	7.81e-13	9.18433	6.41e-16
IFIT3	Homo sapiens interferon-induced protein with tetratricopeptide repeats 3 (IFIT3)	0.422166	0.999617	0.081573	0.999911	-0.20541	0.907302	0.239009	0.999667	-0.12707	0.926778	0.028564	0.997087	0.131411	0.99932	-0.13018	0.891638	0.006672	0.99973	0.041852	0.962608	9.18157	7.05e-16	6.9961	4.62e-15	4.37635	2.15e-10	8.27208	1.92e-14	7.44361	1.48e-15	6.12149	9.21e-14
APOBEC3G	Homo sapiens apolipoprotein B mRNA editing enzyme, catalytic polypeptide-like 3G (APOBEC3G), mRNA	-0.35507	0.999617	0.527205	0.999911	0.255822	0.958618	0.304164	0.999667	-0.36778	0.828125	-0.21771	0.968793	0.248904	0.99932	-0.1378	0.924209	0.181011	0.99973	0.211693	0.852157	4.31821	1.46e-08	6.95385	1.02e-09	3.76412	0.00021	1.80139	0.011122	6.13918	1.28e-08	5.82829	3.93e-08
ETV7	Homo sapiens ets variant 7 (ETV7)	0.520425	0.999617	0.354612	0.999911	-0.34888	0.909195	0.111504	0.999667	-0.97188	0.607424	-0.32094	0.960423	-0.16394	0.99932	-0.68438	0.625238	0.313185	0.99973	-0.64984	0.489418	7.20389	5.21e-11	6.87956	1.23e-13	3.72882	3.43e-06	4.42151	2.9e-06	6.84623	1.34e-13	6.1405	1.61e-11
CD38	Homo sapiens CD38 molecule (CD38), mRNA	-0.50401	0.999617	-0.27464	0.999911	0.370102	0.904037	0.58042	0.999667	0.139248	0.966612	1.04753	0.854986	1.01004	0.99932	0.317074	0.889519	0.113881	0.99973	0.051052	0.979087	4.80443	2.18e-08	6.84	2.05e-10	4.71866	6.83e-07	3.01705	0.000176	7.4806	1.98e-11	6.86575	3.62e-11
EPSTI1	Homo sapiens epithelial stromal interaction 1 (breast) (EPSTI1)	0.368773	0.999617	0.537076	0.999911	0.031459	0.992051	0.58101	0.999667	-0.31265	0.864997	-0.18936	0.975099	-0.08537	0.99932	-0.68925	0.548238	-0.38416	0.99973	-0.7481	0.462394	5.30912	4.22e-10	6.732	2.89e-12	5.66223	6.98e-09	2.7328	0.000146	6.4233	6.9e-12	6.69238	4.31e-11
RUFY4	Homo sapiens RUN and FYVE domain containing 4 (RUFY4)	-0.10758	0.999617	-0.08601	0.999911	-0.151	0.982666	0.011187	0.999667	-0.66612	0.858892	0.163183	0.992812	0.122743	0.99932	0.887319	0.746579	0.092898	0.99973	0.463816	0.853532	4.30375	0.000434	6.66781	2.36e-07	3.37325	0.010076	0.572014	0.764446	5.11756	2.94e-05	5.80353	3.23e-06
CCL8	Homo sapiens chemokine (C-C motif) ligand 8 (CCL8), mRNA	0.801922	0.999617	-0.3118	0.999911	-0.73854	0.888679	-0.28224	0.999667	-0.83836	0.890179	0.607024	0.971238	-0.72836	0.99932	-0.64857	0.889166	-0.70506	0.99973	-0.45799	0.907013	7.04092	1.01e-06	6.5995	1.44e-06	2.88496	0.08114	6.52377	6.34e-06	8.63803	5.58e-09	8.2876	2.94e-07
CXCL9	Homo sapiens chemokine (C-X-C motif) ligand 9 (CXCL9), mRNA	-0.23827	0.999617	0.299164	0.999911	-0.22305	0.964078	0.072488	0.999667	-0.47213	0.917228	0.437752	0.973144	-0.46644	0.99932	-0.79119	0.774576	0.159415	0.99973	0.243795	0.923171	5.90029	1.33e-08	6.59108	4.05e-08	4.72838	1.64e-05	6.55725	3.08e-09	10.6098	6.51e-13	7.80236	2.2e-10
SAMD9	Homo sapiens sterile alpha motif domain containing 9 (SAMD9)	0.065361	0.999617	0.423463	0.999911	0.288781	0.813542	0.329936	0.999667	-0.49636	0.520229	-0.39977	0.855146	-0.274	0.99932	-0.11506	0.900548	0.035277	0.99973	-0.16953	0.790327	6.10402	1.09e-15	6.58558	1.31e-17	3.56046	1.17e-11	3.60866	1.03e-09	6.4573	1.96e-17	5.47271	1.85e-16
C1orf173	Homo sapiens chromosome 1 open reading frame 173 (C1orf173), mRNA	-0.86201	0.999617	-0.71897	0.999911	1.43861	0.751046	0.559899	0.999667	0.457845	0.797472	1.45388	0.677471	-0.61971	0.99932	0.468744	0.788818	-0.34736	0.99973	0.149539	0.944361	3.17112	0.002286	6.46647	2.13e-06	3.02658	0.013144	1.26079	0.323166	4.54978	0.000446	4.09812	0.000271
ISG15	Homo sapiens ISG15 ubiquitin-like modifier (ISG15), mRNA	0.421912	0.999617	0.097343	0.999911	-0.16631	0.886301	0.085757	0.999667	-0.47458	0.542151	-0.02598	0.997087	0.068889	0.99932	-0.70441	0.177332	-0.41232	0.99973	-0.43891	0.334798	5.86625	4.03e-18	6.46395	4.52e-20	4.84677	2.47e-16	5.35136	7.25e-17	6.36059	5.11e-20	5.58052	2.19e-18
OASL	Homo sapiens 2'-5'-oligoadenylate synthetase-like (OASL)	0.518822	0.999617	0.359322	0.999911	-0.32564	0.820025	0.407923	0.999667	0.07578	0.967475	0.113992	0.979547	-0.31734	0.99932	-0.4912	0.59664	-0.33025	0.99973	-0.61478	0.275328	6.60948	6.83e-16	6.44758	3.44e-17	4.22064	9.41e-12	8.4456	8.64e-18	9.05437	5.11e-20	7.04314	3.74e-17
HLA-DOB	Homo sapiens major histocompatibility complex, class II, DO beta (HLA-DOB), mRNA	-0.94967	0.999617	2.38186	0.999911	1.14098	0.886674	-1.15469	0.999667	-0.55487	0.917406	-0.08078	0.99783	-0.71982	0.99932	-3.4549	0.252088	-0.9876	0.99973	-1.21282	0.709884	6.19333	0.000993	6.40055	0.000943	1.94937	0.273148	6.89973	0.000388	8.52518	1.83e-05	5.76898	6.86e-05
ADCYAP1	Homo sapiens adenylate cyclase activating polypeptide 1 (pituitary) (ADCYAP1)	-0.12344	0.999617	-0.08639	0.999911	-1.21722	0.857629	0.011187	0.999667	-0.68285	0.917406	-0.69923	0.968541	-1.16038	0.99932	-1.05564	0.737447	-0.9021	0.99973	0.544531	0.852563	5.73122	0.000493	6.3715	0.000124	1.93824	0.390706	2.99279	0.100615	6.17384	0.000162	5.74463	0.000735
MX1	Homo sapiens myxovirus (influenza virus) resistance 1, interferon-inducible protein p78 (mouse) (MX1)	0.67228	0.999617	0.460085	0.999911	0.054881	0.976629	0.441164	0.999667	-0.42467	0.648429	-0.28808	0.915191	-0.00118	0.999598	-0.35617	0.619427	-0.15188	0.99973	-0.53847	0.280348	6.42929	2.22e-15	6.34801	1.21e-15	4.81157	1.6e-12	3.69259	5.19e-10	5.7995	5.48e-15	5.5333	3.1e-14
ESPNL	Homo sapiens espin-like (ESPNL), mRNA	0.446975	0.999617	0.353206	0.999911	-0.15047	0.982666	-0.45527	0.999667	0.619394	0.718042	0.562135	0.895381	0.828848	0.99932	0.268364	0.866292	0.333898	0.99973	0.44405	0.782836	4.83728	5.3e-07	6.32852	2.14e-08	3.37369	0.000216	2.27764	0.019287	4.90294	3.05e-06	3.46921	5.79e-05
GBP4	Homo sapiens guanylate binding protein 4 (GBP4), mRNA	-0.18891	0.999617	-0.0599	0.999911	-0.005	0.996864	-0.00579	0.999667	-0.13156	0.898463	-0.07858	0.97805	0.040558	0.99932	0.211091	0.782253	0.291133	0.99973	0.021302	0.978293	6.5142	8.55e-18	6.26975	2.6e-18	1.0906	0.001797	5.23824	4.11e-15	6.91409	3.04e-19	4.36023	5.14e-15
CMPK2	Homo sapiens cytidine monophosphate (UMP-CMP) kinase 2, mitochondrial (CMPK2), nuclear gene encoding mitochondrial protein, mRNA	0.316353	0.999617	-0.17371	0.999911	-0.307	0.876878	0.635447	0.999667	0.282951	0.886346	0.100045	0.988252	-0.03318	0.99932	-0.25113	0.861403	0.044401	0.99973	-0.38058	0.696422	7.66495	5.54e-14	6.25306	2.49e-15	5.64207	9.88e-12	5.47515	4.22e-10	6.40907	1.37e-15	6.7746	3.9e-14
CIITA	Homo sapiens class II, major histocompatibility complex, transactivator (CIITA), mRNA	0.050238	0.999617	-0.18371	0.999911	-0.46314	0.94873	-1.88365	0.999667	-0.34366	0.911845	-0.07664	0.997087	-0.43543	0.99932	0.440979	0.889519	-0.08562	0.99973	-0.15289	0.961552	6.35833	1.3e-06	6.20346	2.86e-06	1.38973	0.375701	2.38546	0.07785	7.08443	2e-07	3.81805	0.00157
DDX58	Homo sapiens DEAD (Asp-Glu-Ala-Asp) box polypeptide 58 (DDX58), mRNA	0.400801	0.999617	0.173704	0.999911	0.232449	0.691827	0.1344	0.999667	-0.50841	0.163058	-0.33264	0.710721	0.072613	0.99932	-0.08059	0.853873	0.040829	0.99973	0.008847	0.982656	6.69271	1.63e-22	6.19357	5.62e-23	2.7605	2.6e-14	4.83094	3.18e-19	6.36443	2.68e-23	4.5087	7.48e-20
IFIH1	Homo sapiens interferon induced with helicase C domain 1 (IFIH1), mRNA	0.086585	0.999617	0.236976	0.999911	0.135576	0.868316	0.286395	0.999667	-0.03943	0.959567	-0.07844	0.968395	0.117789	0.99932	-0.06956	0.8918	0.151539	0.99973	0.017472	0.971817	5.86005	2.15e-20	6.17665	1.78e-21	2.9834	6.58e-14	4.62718	1.13e-17	6.35893	7.96e-22	4.36664	2.4e-18
STEAP4	Homo sapiens STEAP family member 4 (STEAP4)	-0.65861	0.999617	1.39542	0.999911	-0.33542	0.96934	0.011891	0.999667	1.14999	0.688268	-0.17738	0.991939	0.70062	0.99932	0.16878	0.967293	-0.88426	0.99973	1.26961	0.529417	5.45927	8.62e-06	6.14118	0.000191	-1.83552	0.315622	1.47375	0.316287	5.188	0.001301	1.32049	0.248555
HERC5	Homo sapiens hect domain and RLD 5 (HERC5), mRNA	-0.19565	0.999617	-0.2115	0.999911	-0.58003	0.275142	-0.26028	0.999667	-0.16835	0.759	0.045794	0.979547	-0.35528	0.99932	-0.17568	0.703691	-0.24938	0.99973	-0.52873	0.052641	4.97989	7.57e-22	6.09674	9.64e-24	3.10322	2.54e-16	4.68631	9.38e-21	6.60011	9.98e-25	4.62906	1.68e-21
ANGPTL1	Homo sapiens angiopoietin-like 1 (ANGPTL1), mRNA	0.066194	0.999617	0.174405	0.999911	0.781307	0.692519	0.920023	0.999667	0.766203	0.249306	-0.14355	0.968395	0.657671	0.99932	0.032441	0.976629	0.196902	0.99973	0.455037	0.535735	3.86971	7.64e-11	6.06492	1.4e-12	4.04454	6.75e-08	2.16561	2.79e-05	6.29153	4.73e-13	6.10848	6.74e-13
ERV9-1	endogenous retrovirus group 9 member 1	-0.52187	0.999617	0.731874	0.999911	-1.89771	0.507735	0.432951	0.999667	1.06818	0.616512	-2.26671	0.60903	1.28064	0.99932	3.39638	0.055058	0.731227	0.99973	1.32713	0.419369	5.60941	7.39e-08	6.05424	2.33e-06	0.725702	0.620833	3.88111	9.94e-05	7.09807	7.85e-08	2.52715	0.016502
OAS1	Homo sapiens 2'-5'-oligoadenylate synthetase 1, 40/46kDa (OAS1)	0.081767	0.999617	0.338053	0.999911	0.140889	0.924516	0.723839	0.999667	-0.1432	0.868881	-0.00436	0.999115	0.190015	0.99932	-0.30719	0.543695	-0.11299	0.99973	-0.13536	0.783257	4.45535	1.88e-15	6.03773	1.31e-17	4.4153	6.36e-15	2.78717	3.89e-10	5.30849	2.42e-16	5.13815	5.16e-17
IFI16	Homo sapiens interferon, gamma-inducible protein 16 (IFI16)	-0.15563	0.999617	0.41745	0.999911	-0.22367	0.94699	0.52373	0.999667	0.362517	0.890508	-0.05826	0.997087	-0.39056	0.99932	-0.00369	0.998678	0.267308	0.99973	0.515297	0.704416	5.51713	3.36e-09	5.91118	5.99e-11	3.34289	1.75e-05	1.56353	0.074946	4.94579	3.2e-09	5.61111	1.23e-10
DDX60L	Homo sapiens DEAD (Asp-Glu-Ala-Asp) box polypeptide 60-like (DDX60L), mRNA	0.177983	0.999617	0.486772	0.999911	0.335726	0.707396	0.210273	0.999667	-0.32906	0.655777	-0.15146	0.949083	0.034723	0.99932	0.068612	0.929584	0.148337	0.99973	0.061049	0.924886	4.77751	4.46e-15	5.90803	3.08e-17	2.58688	7.7e-09	1.61825	2.27e-05	5.2935	2.7e-16	3.70494	9.4e-13
DUOXA2	Homo sapiens dual oxidase maturation factor 2 (DUOXA2), mRNA	-0.10758	0.999617	-0.08601	0.999911	-0.151	0.983314	0.011187	0.999667	0.169506	0.97476	0.163183	0.993	-0.72265	0.99932	0.19277	0.956391	0.89797	0.99973	0.089197	0.977121	4.29331	0.000609	5.86606	4.79e-06	1.1578	0.491972	3.99174	0.00195	7.63982	1.9e-08	4.79699	0.000109
HERC6	Homo sapiens hect domain and RLD 6 (HERC6)	0.062721	0.999617	0.113074	0.999911	0.14166	0.915524	0.156184	0.999667	-0.11722	0.911036	-0.13695	0.960423	-0.24479	0.99932	-0.20311	0.791676	-0.09251	0.99973	-0.25267	0.657108	5.12774	9e-16	5.83081	5.83e-18	4.07064	3.08e-13	3.35514	8.94e-11	5.68427	9.51e-18	5.22807	2.92e-16
LGALS9	Homo sapiens lectin, galactoside-binding, soluble, 9 (LGALS9)	0.170795	0.999617	0.122197	0.999911	-0.04185	0.993132	-0.25295	0.999667	-0.0756	0.984383	-0.01875	0.999115	-0.36515	0.99932	-0.10849	0.97027	-2.18962	0.99973	-0.32588	0.880751	4.64142	1.75e-05	5.81504	6.79e-09	4.40492	7.39e-06	1.50953	0.222923	4.56739	8.44e-07	6.41601	1e-09
DDX60	Homo sapiens DEAD (Asp-Glu-Ala-Asp) box polypeptide 60 (DDX60), mRNA	0.130239	0.999617	0.347607	0.999911	-0.03054	0.984048	0.230723	0.999667	-0.2274	0.755568	-0.30746	0.860471	0.033304	0.99932	-0.10459	0.879036	-0.00033	0.99973	-0.15132	0.741626	4.65082	5.19e-16	5.79206	5.87e-18	4.32288	4.4e-14	3.24389	7.59e-12	5.69815	8.71e-18	4.99082	3.95e-16
DUOX2	Homo sapiens dual oxidase 2 (DUOX2), mRNA	2.32185	0.999617	1.49105	0.999911	0.013838	0.99818	0.343261	0.999667	0.143883	0.979874	-1.79549	0.865155	-1.59215	0.99932	0.535485	0.888122	0.945992	0.99973	0.166622	0.957861	3.87827	0.018552	5.75081	2.06e-05	3.79688	0.011401	3.67217	0.031186	6.90482	6.9e-07	7.12311	1.45e-06
SECTM1	Homo sapiens secreted and transmembrane 1 (SECTM1), mRNA	-0.67892	0.999617	-0.37737	0.999911	-0.40437	0.947827	-0.07812	0.999667	-0.09476	0.984424	-0.01657	0.999115	0.40463	0.99932	-0.17791	0.936269	0.054214	0.99973	0.046196	0.983186	5.5619	8.59e-05	5.74561	6.29e-06	0.509823	0.794722	2.77984	0.066284	6.41345	7.15e-07	3.68331	0.004369
IFIT1B	Homo sapiens interferon-induced protein with tetratricopeptide repeats 1B (IFIT1B), mRNA	-0.10758	0.999617	-0.08601	0.999911	-0.151	0.98127	-1.2488	0.999667	1.59865	0.495061	1.34484	0.792162	-1.04166	0.99932	-1.92822	0.230483	0.092898	0.99973	0.286931	0.905965	4.36541	0.000124	5.74373	1.08e-06	1.04887	0.407846	2.73149	0.023724	5.17311	6.89e-06	2.53543	0.011018
LMO2	Homo sapiens LIM domain only 2 (rhombotin-like 1) (LMO2)	-0.28458	0.999617	0.291248	0.999911	-0.72714	0.912319	0.574558	0.999667	0.161929	0.966728	-0.70392	0.934156	-0.53993	0.99932	0.020774	0.995383	0.14926	0.99973	0.401229	0.827668	5.73698	1.29e-06	5.68824	3.25e-07	2.21225	0.121752	2.68484	0.022145	6.03082	8.22e-08	5.1149	5.5e-05
UPP2	Homo sapiens uridine phosphorylase 2 (UPP2)	-1.24437	0.999617	0.708834	0.999911	-0.151	0.983761	0.011187	0.999667	1.69525	0.043017	1.47162	0.553024	2.04472	0.99932	0.59045	0.847006	0.555224	0.99973	1.31404	0.455139	1.22088	0.356811	5.67413	4.85e-05	6.52818	1.43e-05	0.384156	0.821698	4.28853	0.001877	8.77015	1.3e-08
CSAG2	Homo sapiens CSAG family, member 2 (CSAG2)	-0.10758	0.999617	-0.08601	0.999911	-1.90216	0.45149	0.011187	0.999667	1.68304	0.466623	-0.12066	0.992822	-1.43557	0.99932	0.19277	0.947586	0.092898	0.99973	0.089197	0.971817	5.39112	9.41e-07	5.66274	3.6e-07	-0.01216	0.995142	6.13725	1.19e-07	8.86268	7.66e-12	8.90402	1.16e-11
PRIC285	Homo sapiens peroxisomal proliferator-activated receptor A interacting complex 285 (PRIC285)	0.2487	0.999617	0.256497	0.999911	-0.14152	0.91761	-0.15372	0.999667	-0.34295	0.655777	0.038203	0.992812	-0.24537	0.99932	-0.43213	0.399662	-0.28444	0.99973	-0.47725	0.231213	4.50811	7.58e-15	5.52684	4.8e-17	3.13692	5.37e-11	2.68687	2.63e-09	5.16954	2.29e-16	3.92482	9.21e-14
ALMS1P	Homo sapiens Alstrom syndrome 1 pseudogene (ALMS1P), non-coding RNA	0.922391	0.999617	-0.48689	0.999911	1.7645	0.673786	-1.06048	0.999667	1.67864	0.549001	0.895188	0.922443	0.806452	0.99932	2.0249	0.407808	0.462548	0.99973	-0.44776	0.821143	5.26851	8.6e-05	5.4922	1.84e-05	2.21724	0.070551	2.05692	0.184588	4.62847	0.000215	3.691	0.000704
HRASLS2	Homo sapiens HRAS-like suppressor 2 (HRASLS2), mRNA	0.41878	0.999617	1.20584	0.999911	-0.84281	0.855524	0.126973	0.999667	0.457184	0.777152	-0.06904	0.996361	-0.55919	0.99932	-0.14094	0.955798	0.069891	0.99973	-0.96936	0.55447	2.83829	0.000138	5.44964	1.36e-06	4.87904	1.67e-05	1.24079	0.149954	6.24741	7.88e-08	7.6524	6.08e-10
RXRG	Homo sapiens retinoid X receptor, gamma (RXRG)	0.422933	0.999617	0.615483	0.999911	1.40639	0.741809	0.011187	0.999667	-0.30689	0.912551	-0.07242	0.997087	-1.35986	0.99932	1.44652	0.465018	-1.64931	0.99973	-0.71792	0.730111	2.15053	0.043112	5.41429	7.89e-05	3.65487	0.012464	1.9701	0.076388	6.51023	2.92e-06	5.9061	1.56e-05
XAF1	Homo sapiens XIAP associated factor 1 (XAF1)	0.411615	0.999617	0.507128	0.999911	0.209746	0.895557	0.469386	0.999667	0.044679	0.970293	-0.04927	0.991129	0.240708	0.99932	-0.06048	0.94379	-0.10117	0.99973	0.023847	0.97474	5.13819	5.7e-14	5.35314	1.92e-15	4.6547	2.27e-13	3.36132	3.31e-09	5.34593	1.77e-15	5.65659	6.98e-16
TRIM22	Homo sapiens tripartite motif containing 22 (TRIM22)	0.082067	0.999617	0.041852	0.999911	0.040857	0.984048	-0.11557	0.999667	-0.2673	0.822996	-0.09698	0.97805	0.317971	0.99932	-0.1536	0.864306	0.242902	0.99973	0.1347	0.852563	3.20053	9.87e-09	5.34609	3.92e-13	3.32703	3.31e-08	1.02561	0.030126	4.70314	5.34e-12	4.81788	4.05e-12
LOC729444	Homo sapiens uncharacterized LOC729444 (LOC729444), non-coding RNA	-0.10758	0.999617	0.532081	0.999911	-1.33851	0.820752	0.011187	0.999667	2.55816	0.464885	0.9426	0.946714	0.090113	0.99932	-0.99607	0.797258	0.869944	0.99973	-0.23104	0.954423	6.06332	0.000207	5.29742	0.001165	-0.01216	0.997008	0.950666	0.70607	5.76631	0.000367	4.32608	0.00716
USP18	Homo sapiens ubiquitin specific peptidase 18 (USP18), mRNA	0.046297	0.999617	-0.23416	0.999911	-0.13195	0.90226	0.400767	0.999667	-0.18162	0.819315	0.132069	0.953535	0.272707	0.99932	-0.1013	0.863922	0.151921	0.99973	0.15992	0.696422	5.56756	2.91e-18	5.24099	7.49e-19	3.34448	2.64e-13	3.19574	9.45e-12	4.87113	3.43e-18	4.53223	5.7e-17
MLKL	Homo sapiens mixed lineage kinase domain-like (MLKL)	0.490939	0.999617	0.649008	0.999911	0.302243	0.83161	0.188922	0.999667	-0.47404	0.559414	0.002752	0.9996	0.073157	0.99932	-0.3591	0.624739	0.26952	0.99973	-0.18209	0.786834	5.42528	6.76e-13	5.2214	2.78e-14	0.86644	0.018201	2.0668	0.000397	4.73221	3.63e-13	2.92073	4.61e-11
RAB39A	Homo sapiens RAB39A, member RAS oncogene family (RAB39A), mRNA	1.29727	0.999617	-0.53021	0.999911	-0.70539	0.899657	0.195344	0.999667	-0.98035	0.764806	-1.60701	0.865155	-0.83085	0.99932	1.39806	0.472761	-0.35339	0.99973	-0.63182	0.689143	3.90291	0.001711	5.18628	9.98e-05	0.461344	0.794955	2.49855	0.067152	4.65201	0.000373	3.21795	0.002919
RIMS2	Homo sapiens regulating synaptic membrane exocytosis 2 (RIMS2)	-0.10758	0.999617	-0.08601	0.999911	0.647545	0.886674	0.011187	0.999667	0.169506	0.971673	0.907966	0.913294	0.090113	0.99932	1.41317	0.506157	0.092898	0.99973	0.081919	0.975883	3.72884	0.00123	5.1846	9.54e-06	-0.01216	0.995602	0.974181	0.54043	6.7875	3.39e-08	4.4018	0.000112
BATF2	Homo sapiens basic leucine zipper transcription factor, ATF-like 2 (BATF2), mRNA	-0.03575	0.999617	-0.21511	0.999911	0.361318	0.886674	0.610951	0.999667	0.224723	0.891748	0.452705	0.897741	0.269724	0.99932	-0.29109	0.808965	0.118656	0.99973	-0.07111	0.954348	6.55188	4.36e-12	4.98537	1.55e-11	2.93073	1.29e-05	5.19084	2.62e-09	5.15923	5.6e-12	4.70165	1.63e-10
RTP4	Homo sapiens receptor (chemosensory) transporter protein 4 (RTP4), mRNA	0.165083	0.999617	-0.12073	0.999911	-0.20357	0.927792	0.053671	0.999667	0.003105	0.998436	0.001991	0.9996	0.082425	0.99932	-0.53284	0.406268	-0.02144	0.99973	-0.03887	0.965953	6.82376	5.82e-12	4.9667	1.12e-13	3.74153	2.29e-09	5.82106	6.76e-10	5.00319	8.9e-14	5.03685	2.86e-13
CSAG1	Homo sapiens chondrosarcoma associated gene 1 (CSAG1)	-0.10758	0.999617	-0.08601	0.999911	-0.151	0.976415	0.011187	0.999667	0.169506	0.963833	0.163183	0.988252	0.090113	0.99932	0.19277	0.938979	0.092898	0.99973	0.089197	0.967641	3.67529	0.000108	4.95255	5.58e-07	2.88627	0.00429	1.34451	0.232697	5.62283	2.87e-08	6.08532	5.48e-09
HSH2D	Homo sapiens hematopoietic SH2 domain containing (HSH2D), mRNA	0.390833	0.999617	-0.02884	0.999911	-1.54958	0.349173	0.291558	0.999667	-0.00625	0.998045	-0.97191	0.778845	0.040857	0.99932	0.433491	0.732556	0.478587	0.99973	0.384542	0.715258	4.12813	1.83e-09	4.92923	1.6e-12	3.21145	3.93e-06	1.43868	0.024741	4.51882	1.39e-11	5.57207	3.12e-12
NFE2L3	Homo sapiens nuclear factor (erythroid-derived 2)-like 3 (NFE2L3), mRNA	0.376323	0.999617	0.220452	0.999911	-0.11757	0.983761	0.275177	0.999667	-0.777	0.758943	-1.21867	0.827525	-0.97729	0.99932	-0.26103	0.894259	0.167934	0.99973	-0.5704	0.52081	3.26579	0.000619	4.91883	1.37e-06	3.55137	0.008378	2.54805	0.009876	4.79681	1.85e-06	5.91976	5.74e-06
SOCS1	Homo sapiens suppressor of cytokine signaling 1 (SOCS1), mRNA	-0.18096	0.999617	-0.25701	0.999911	-0.40964	0.932774	0.565273	0.999667	-2.78253	0.419999	-0.30452	0.97805	0.701923	0.99932	0.130825	0.964719	0.491516	0.99973	-0.81611	0.715179	6.55304	1.71e-10	4.88119	5.4e-07	1.81997	0.106159	5.24356	4.91e-08	5.74129	1.58e-08	4.18981	3.17e-05
IFI27	Homo sapiens interferon, alpha-inducible protein 27 (IFI27)	0.375683	0.999617	0.058442	0.999911	-0.62365	0.710691	1.27998	0.999667	-0.69692	0.637794	-0.73764	0.842991	-0.10052	0.99932	-0.737	0.645117	0.073665	0.99973	-1.54296	0.145672	3.35192	2.14e-08	4.87813	6.1e-14	8.33468	2.03e-14	0.889504	0.149821	3.22065	2.79e-09	8.74324	1.01e-15
C12orf63	RecName: Full=Putative uncharacterized protein C12orf63	0.644168	0.999617	-0.92443	0.999911	1.41951	0.721652	0.011187	0.999667	-0.09318	0.978519	-1.06617	0.880888	1.22115	0.99932	-1.7822	0.421368	0.535777	0.99973	-0.06932	0.978904	3.40514	0.005477	4.86091	7.66e-05	3.68735	0.007636	3.97156	0.001466	6.38083	5.57e-07	5.95933	5.65e-06
IL18BP	Homo sapiens interleukin 18 binding protein (IL18BP)	-0.76246	0.999617	-0.6858	0.999911	0.382078	0.81601	-0.33321	0.999667	-0.35126	0.843601	-0.73175	0.854986	0.684968	0.99932	0.273996	0.853144	-0.2772	0.99973	-0.53499	0.488675	3.82556	4.53e-11	4.85043	5.98e-14	3.99921	1.48e-10	0.528295	0.355228	3.83013	3.01e-11	4.16448	1.5e-11
CSAG3	Homo sapiens CSAG family, member 3 (CSAG3)	-0.62555	0.999617	0.113981	0.999911	0.634058	0.911039	0.018455	0.999667	1.82304	0.591524	-0.10101	0.997087	-0.30842	0.99932	-1.20267	0.663034	-0.53999	0.99973	-1.11684	0.636004	1.89649	0.118541	4.8486	5.91e-05	5.35651	0.000282	2.4878	0.037901	6.18345	8.63e-07	9.57712	3.28e-09
APOBEC3F	Homo sapiens apolipoprotein B mRNA editing enzyme, catalytic polypeptide-like 3F (APOBEC3F)	0.254223	0.999617	0.150593	0.999911	-0.04818	0.983761	-0.39046	0.999667	-0.31241	0.768491	-0.28407	0.91999	0.031864	0.99932	-0.30962	0.67314	-0.05531	0.99973	-0.13284	0.863662	4.51136	1.08e-10	4.81529	6.8e-12	1.49445	0.001912	2.28937	0.000114	4.2479	1.29e-10	2.43732	5.26e-07
PTN	Homo sapiens pleiotrophin (PTN), mRNA	-1.47033	0.999617	-0.44711	0.999911	-0.38178	0.934206	-0.66643	0.999667	-0.79218	0.783546	0.175979	0.991129	-1.5143	0.99932	-2.05052	0.329084	-0.90021	0.99973	-0.53624	0.77181	0.191084	0.891497	4.8114	1.71e-06	5.96008	8.02e-06	-1.59748	0.22297	3.85737	6.84e-05	7.29401	4.27e-08
SPTBN5	Homo sapiens spectrin, beta, non-erythrocytic 5 (SPTBN5), mRNA	-0.10006	0.999617	-0.29245	0.999911	-0.72555	0.863156	-0.32102	0.999667	-0.35552	0.879099	-0.00565	0.999237	0.060444	0.99932	-0.65144	0.597078	-0.18956	0.99973	-0.09739	0.93889	3.92659	2.83e-06	4.81089	5.13e-07	1.70237	0.045256	3.12419	0.000162	5.18148	9.43e-08	3.47157	1.39e-05
HTR2B	Homo sapiens 5-hydroxytryptamine (serotonin) receptor 2B (HTR2B), mRNA	0.685737	0.999617	-0.54622	0.999911	-0.412	0.943636	2.29532	0.999667	0.434801	0.789986	0.355017	0.953535	0.388071	0.99932	-1.23711	0.493129	-0.08545	0.99973	-0.20442	0.939471	4.08223	0.000343	4.79978	0.000233	4.14641	0.00453	2.50622	0.040703	5.3761	3.92e-05	5.66231	3.8e-05
NLRC5	Homo sapiens NLR family, CARD domain containing 5 (NLRC5), mRNA	0.023626	0.999617	-0.06127	0.999911	-0.2784	0.763619	-0.29351	0.999667	-0.84858	0.143894	-0.355	0.845295	-0.00186	0.99932	-0.23217	0.69891	-0.3012	0.99973	-0.37715	0.257897	4.13625	1.15e-15	4.79875	7.53e-18	1.58908	1.57e-06	0.922238	0.007421	4.66573	1.41e-17	3.66196	1.06e-15
SP110	Homo sapiens SP110 nuclear body protein (SP110)	0.432207	0.999617	0.321883	0.999911	0.286639	0.760746	0.278682	0.999667	-0.17095	0.835351	-0.18328	0.931895	-0.30192	0.99932	-0.23998	0.670987	-0.07656	0.99973	-0.19576	0.663692	4.47696	4.43e-15	4.79531	3.37e-17	2.20564	1.22e-08	1.62029	6.45e-05	4.14885	1.65e-15	3.30699	1.24e-13
LINC00890	Homo sapiens long intergenic non-protein coding RNA 890	2.12014	0.760273	-0.36996	0.999911	-2.12332	0.314184	0.408169	0.999667	0.169506	0.966102	1.00515	0.871051	0.819773	0.99932	0.19277	0.942013	0.092898	0.99973	0.089197	0.968939	6.90982	6.92e-10	4.79268	2.95e-08	-0.02644	0.987484	3.08647	0.00241	5.10407	5.7e-09	4.60341	1.49e-06
TLX1	Homo sapiens T-cell leukemia homeobox 1 (TLX1)	0.021724	0.999617	0.804763	0.999911	0.265886	0.950468	0.374237	0.999667	0.355069	0.821397	0.946739	0.725596	-0.04958	0.99932	-0.94632	0.365044	-0.79349	0.99973	-0.74105	0.479745	2.0002	0.019452	4.72005	0.000149	1.95456	0.020991	1.03822	0.307176	3.98379	0.001194	1.37972	0.087381
DHX58	Homo sapiens DEXH (Asp-Glu-X-His) box polypeptide 58 (DHX58), mRNA	0.18617	0.999617	0.166041	0.999911	0.036156	0.98966	0.025225	0.999667	0.246986	0.848055	0.177131	0.965328	0.025783	0.99932	-0.13255	0.894259	0.09098	0.99973	0.201316	0.816008	3.64928	2.74e-08	4.71292	1.26e-10	2.56106	8.69e-06	3.75341	3.15e-08	5.61619	1.58e-12	3.58118	3.32e-09
SLFN12	Homo sapiens schlafen family member 12 (SLFN12), mRNA	1.01324	0.999617	0.204244	0.999911	0.884785	0.768599	0.182943	0.999667	-0.24674	0.902795	-1.12875	0.771077	-0.62678	0.99932	-0.10353	0.949916	0.012862	0.99973	-0.24593	0.827227	4.04861	6.79e-05	4.71021	5.85e-06	1.76617	0.029625	2.53105	0.01648	4.47357	1.23e-05	3.28007	1.65e-05
EXOC3L1	Homo sapiens exocyst complex component 3-like 1 (EXOC3L1), mRNA	0.539079	0.999617	0.452116	0.999911	0.910258	0.888443	0.535523	0.999667	1.05784	0.744228	0.609788	0.965168	2.58088	0.979443	-0.51633	0.882696	0.110908	0.99973	-0.83355	0.669428	3.6453	0.019558	4.7014	0.000593	-0.01129	0.996586	0.997847	0.651538	4.00331	0.003139	3.53699	0.004643
IQSEC3	Homo sapiens IQ motif and Sec7 domain 3 (IQSEC3)	-1.04208	0.999617	0.682677	0.999911	0.703321	0.934397	-0.44078	0.999667	2.01389	0.637794	-0.0587	0.998362	0.850904	0.99932	0.249976	0.951947	0.720396	0.99973	-0.55883	0.876395	1.29255	0.475111	4.69967	0.012227	1.3325	0.548955	2.15598	0.178703	7.61516	3.94e-05	4.97806	0.00126
CYP1B1	Homo sapiens cytochrome P450, family 1, subfamily B, polypeptide 1 (CYP1B1), mRNA	0.134949	0.999617	-0.00783	0.999911	-0.56395	0.655439	-0.08584	0.999667	0.093975	0.959567	0.497249	0.850552	0.50239	0.99932	0.585715	0.449232	0.352038	0.99973	0.028109	0.977836	3.51105	4.77e-13	4.65924	5.36e-15	-0.01439	0.985419	0.602081	0.084783	4.38885	2.23e-14	1.39875	0.001604
CLEC2B	Homo sapiens C-type lectin domain family 2, member B (CLEC2B), mRNA	-0.77461	0.999617	0.325296	0.999911	0.010111	0.996864	0.228155	0.999667	0.006545	0.997503	0.142747	0.97172	0.39604	0.99932	-0.35413	0.70524	0.326019	0.99973	0.116014	0.90341	2.60767	7.32e-06	4.65118	1.9e-09	1.61088	0.002885	1.34574	0.022682	4.10772	2.77e-08	2.4055	4.63e-06
MAB21L2	Homo sapiens mab-21-like 2 (C. elegans) (MAB21L2), mRNA	-0.60726	0.999617	-0.28421	0.999911	-0.62356	0.83161	0.22064	0.999667	0.449334	0.91004	-1.38015	0.86878	-1.51474	0.99932	-2.65942	0.237232	-0.61776	0.99973	0.697453	0.710167	6.63004	1.11e-09	4.62683	7.21e-10	3.03375	0.016227	4.74697	2.17e-06	5.27999	2.18e-11	7.22959	3.34e-08
PLEKHA4	Homo sapiens pleckstrin homology domain containing, family A (phosphoinositide binding specific) member 4 (PLEKHA4)	0.052726	0.999617	0.289788	0.999911	0.21758	0.873598	0.105435	0.999667	-0.30485	0.787749	0.048644	0.99225	0.003613	0.99932	-0.0116	0.989702	0.222421	0.99973	0.272532	0.610545	4.09044	4.88e-13	4.61629	1.51e-14	1.39541	0.000408	2.9642	2.14e-09	4.57155	1.85e-14	2.82215	6.18e-10
TNFSF10	Homo sapiens tumor necrosis factor (ligand) superfamily, member 10 (TNFSF10)	-0.16649	0.999617	0.049947	0.999911	0.44629	0.711167	0.38053	0.999667	0.649216	0.455319	0.553672	0.78047	0.529308	0.99932	0.380525	0.614748	0.218849	0.99973	0.48334	0.361099	6.0607	2.05e-13	4.6105	2.29e-11	1.69149	0.000663	3.43153	2.65e-08	4.98262	4.27e-12	3.00813	7.5e-08
FBXO39	Homo sapiens F-box protein 39 (FBXO39), mRNA	-0.1133	0.999617	-0.08603	0.999911	2.15272	0.40529	0.99162	0.999667	0.525189	0.856405	-0.30209	0.969705	0.291712	0.99932	0.281471	0.880252	0.992463	0.99973	-0.92585	0.430897	4.60032	4.72e-06	4.56872	8.75e-05	5.08816	1.66e-05	2.32801	0.023829	5.15848	1.05e-05	6.01724	2.08e-07
